# Supplementary material for: Transcriptomic Study of Porcine Small Intestine Epithelial Cells Reveals Important Genes and Pathways Associated With Susceptibility to Escherichia coli F4ac Diarrhea
Source: Front Genet. 2020 Feb 27;11:68. doi: 10.3389/fgene.2020.00068 (PMC7056726; doi:10.3389/fgene.2020.00068)
Supplement: Supplementary file 9 [file Table_6.xlsx]

## Sheet: Sheet1
Supplementary Table S6: KEGG functional annotation table of genes exclusively expressed in Adhesive small intestine epithelial cells of Large white piglets
ID	Gene Name	Species	KEGG_PATHWAY
ENSSSCG00000006716	3-hydroxy-3-methylglutaryl-CoA synthase 2(HMGCS2)	Sus scrofa	ssc00072:Synthesis and degradation of ketone bodies,ssc00280:Valine, leucine and isoleucine degradation,ssc00650:Butanoate metabolism,ssc00900:Terpenoid backbone biosynthesis,ssc01100:Metabolic pathways,ssc01130:Biosynthesis of antibiotics,
ENSSSCG00000024497	5-hydroxytryptamine receptor 3A(HTR3A)	Sus scrofa	ssc04726:Serotonergic synapse,
ENSSSCG00000003523	EPH receptor A8(EPHA8)	Sus scrofa	ssc04360:Axon guidance,
ENSSSCG00000013976	L-amino-acid oxidase-like(LOC100525099)	Sus scrofa	ssc00250:Alanine, aspartate and glutamate metabolism,ssc00270:Cysteine and methionine metabolism,ssc00280:Valine, leucine and isoleucine degradation,ssc00350:Tyrosine metabolism,ssc00360:Phenylalanine metabolism,ssc00380:Tryptophan metabolism,ssc00400:Phenylalanine, tyrosine and tryptophan biosynthesis,ssc01100:Metabolic pathways,
ENSSSCG00000007078	SEL1L2 ERAD E3 ligase adaptor subunit(SEL1L2)	Sus scrofa	ssc04141:Protein processing in endoplasmic reticulum,
ENSSSCG00000002498	T-cell leukemia/lymphoma 1A(TCL1A)	Sus scrofa	ssc04151:PI3K-Akt signaling pathway,
ENSSSCG00000005059	TATA-box binding protein like 2(TBPL2)	Sus scrofa	ssc03022:Basal transcription factors,ssc05016:Huntington's disease,ssc05166:HTLV-I infection,ssc05168:Herpes simplex infection,ssc05203:Viral carcinogenesis,
ENSSSCG00000008935	UDP-glucuronosyltransferase 2B17(LOC100513872)	Sus scrofa	ssc00040:Pentose and glucuronate interconversions,ssc00053:Ascorbate and aldarate metabolism,ssc00140:Steroid hormone biosynthesis,ssc00830:Retinol metabolism,ssc00860:Porphyrin and chlorophyll metabolism,ssc00980:Metabolism of xenobiotics by cytochrome P450,ssc00982:Drug metabolism - cytochrome P450,ssc00983:Drug metabolism - other enzymes,ssc01100:Metabolic pathways,ssc05204:Chemical carcinogen…
ENSSSCG00000027024	acid sensing ion channel subunit 3(ASIC3)	Sus scrofa	ssc04750:Inflammatory mediator regulation of TRP channels,
ENSSSCG00000018044	aldehyde dehydrogenase 3 family member A1(ALDH3A1)	Sus scrofa	ssc00010:Glycolysis / Gluconeogenesis,ssc00340:Histidine metabolism,ssc00350:Tyrosine metabolism,ssc00360:Phenylalanine metabolism,ssc00410:beta-Alanine metabolism,ssc00980:Metabolism of xenobiotics by cytochrome P450,ssc00982:Drug metabolism - cytochrome P450,ssc01100:Metabolic pathways,ssc05204:Chemical carcinogenesis,
ENSSSCG00000017978	arachidonate 15-lipoxygenase B(LOC100525835)	Sus scrofa	ssc00590:Arachidonic acid metabolism,ssc01100:Metabolic pathways,ssc04726:Serotonergic synapse,
ENSSSCG00000015639	arginine vasopressin receptor 1B(AVPR1B)	Sus scrofa	ssc04020:Calcium signaling pathway,ssc04080:Neuroactive ligand-receptor interaction,ssc04270:Vascular smooth muscle contraction,
ENSSSCG00000014108	betaine--homocysteine S-methyltransferase(BHMT)	Sus scrofa	ssc00260:Glycine, serine and threonine metabolism,ssc00270:Cysteine and methionine metabolism,ssc01100:Metabolic pathways,
ENSSSCG00000003257	calcium voltage-gated channel auxiliary subunit gamma 6(CACNG6)	Sus scrofa	ssc04010:MAPK signaling pathway,ssc04260:Cardiac muscle contraction,ssc04261:Adrenergic signaling in cardiomyocytes,ssc04921:Oxytocin signaling pathway,ssc05410:Hypertrophic cardiomyopathy (HCM),ssc05412:Arrhythmogenic right ventricular cardiomyopathy (ARVC),ssc05414:Dilated cardiomyopathy,
ENSSSCG00000025532	calcium voltage-gated channel auxiliary subunit gamma 7(CACNG7)	Sus scrofa	ssc04010:MAPK signaling pathway,ssc04260:Cardiac muscle contraction,ssc04261:Adrenergic signaling in cardiomyocytes,ssc04921:Oxytocin signaling pathway,ssc05410:Hypertrophic cardiomyopathy (HCM),ssc05412:Arrhythmogenic right ventricular cardiomyopathy (ARVC),ssc05414:Dilated cardiomyopathy,
ENSSSCG00000006141	carbonic anhydrase 3(CA3)	Sus scrofa	ssc00910:Nitrogen metabolism,
ENSSSCG00000014630	cyclic nucleotide gated channel alpha 4(CNGA4)	Sus scrofa	ssc04024:cAMP signaling pathway,ssc04740:Olfactory transduction,
ENSSSCG00000030168	cytochrome P450 19A2(CYP19A2)	Sus scrofa	ssc00140:Steroid hormone biosynthesis,ssc01100:Metabolic pathways,ssc04913:Ovarian steroidogenesis,
ENSSSCG00000010546	cytochrome P450 2C33(CYP2C33)	Sus scrofa	ssc00140:Steroid hormone biosynthesis,ssc00590:Arachidonic acid metabolism,ssc00591:Linoleic acid metabolism,ssc00830:Retinol metabolism,ssc01100:Metabolic pathways,ssc04726:Serotonergic synapse,ssc04750:Inflammatory mediator regulation of TRP channels,ssc05204:Chemical carcinogenesis,
ENSSSCG00000026798	cytochrome P450 C42(CYP2C42)	Sus scrofa	ssc00140:Steroid hormone biosynthesis,ssc00590:Arachidonic acid metabolism,ssc00591:Linoleic acid metabolism,ssc00830:Retinol metabolism,ssc01100:Metabolic pathways,ssc04726:Serotonergic synapse,ssc04750:Inflammatory mediator regulation of TRP channels,ssc05204:Chemical carcinogenesis,
ENSSSCG00000006238	cytochrome P450, family 7, subfamily A, polypeptide 1(CYP7A1)	Sus scrofa	ssc00120:Primary bile acid biosynthesis,ssc00140:Steroid hormone biosynthesis,ssc01100:Metabolic pathways,ssc03320:PPAR signaling pathway,ssc04976:Bile secretion,
ENSSSCG00000026532	deoxyribonuclease 2 beta(DNASE2B)	Sus scrofa	ssc04142:Lysosome,
ENSSSCG00000006320	dimethylaniline monooxygenase [N-oxide-forming] 5-like(LOC100151788)	Sus scrofa	ssc00982:Drug metabolism - cytochrome P450,
ENSSSCG00000005109	estrogen receptor 2(ESR2)	Sus scrofa	ssc04915:Estrogen signaling pathway,ssc04917:Prolactin signaling pathway,
ENSSSCG00000014052	eukaryotic translation initiation factor 4E family member 1B(EIF4E1B)	Sus scrofa	ssc03013:RNA transport,ssc04066:HIF-1 signaling pathway,ssc04150:mTOR signaling pathway,ssc04151:PI3K-Akt signaling pathway,ssc04910:Insulin signaling pathway,
ENSSSCG00000024314	fibrinogen gamma chain(FGG)	Sus scrofa	ssc04610:Complement and coagulation cascades,ssc04611:Platelet activation,ssc05150:Staphylococcus aureus infection,
ENSSSCG00000022833	fibroblast growth factor 16(LOC100152223)	Sus scrofa	ssc04010:MAPK signaling pathway,ssc04014:Ras signaling pathway,ssc04015:Rap1 signaling pathway,ssc04151:PI3K-Akt signaling pathway,ssc04810:Regulation of actin cytoskeleton,ssc05200:Pathways in cancer,ssc05218:Melanoma,
ENSSSCG00000004827	gamma-aminobutyric acid type A receptor alpha5 subunit(GABRA5)	Sus scrofa	ssc04080:Neuroactive ligand-receptor interaction,ssc04723:Retrograde endocannabinoid signaling,ssc04727:GABAergic synapse,ssc05032:Morphine addiction,ssc05033:Nicotine addiction,
ENSSSCG00000021902	gamma-aminobutyric acid type A receptor pi subunit(GABRP)	Sus scrofa	ssc04080:Neuroactive ligand-receptor interaction,ssc04723:Retrograde endocannabinoid signaling,ssc04727:GABAergic synapse,ssc05032:Morphine addiction,ssc05033:Nicotine addiction,
ENSSSCG00000001214	glutathione peroxidase 5(GPX5)	Sus scrofa	ssc00480:Glutathione metabolism,ssc00590:Arachidonic acid metabolism,ssc04918:Thyroid hormone synthesis,
ENSSSCG00000000577	glycogen synthase 2(GYS2)	Sus scrofa	ssc00500:Starch and sucrose metabolism,ssc04151:PI3K-Akt signaling pathway,ssc04152:AMPK signaling pathway,ssc04910:Insulin signaling pathway,ssc04922:Glucagon signaling pathway,ssc04931:Insulin resistance,
ENSSSCG00000009046	glycophorin A (MNS blood group)(GYPA)	Sus scrofa	ssc05144:Malaria,
ENSSSCG00000031035	glycoprotein V platelet(GP5)	Sus scrofa	ssc04512:ECM-receptor interaction,ssc04611:Platelet activation,ssc04640:Hematopoietic cell lineage,
ENSSSCG00000023261	growth differentiation factor 5(GDF5)	Sus scrofa	ssc04350:TGF-beta signaling pathway,ssc04390:Hippo signaling pathway,
ENSSSCG00000016977	histone H2B subacrosomal variant-like(LOC100519930)	Sus scrofa	ssc05034:Alcoholism,ssc05203:Viral carcinogenesis,ssc05322:Systemic lupus erythematosus,
ENSSSCG00000027439	hydroxyacid oxidase 1(HAO1)	Sus scrofa	ssc00630:Glyoxylate and dicarboxylate metabolism,ssc01100:Metabolic pathways,ssc01130:Biosynthesis of antibiotics,ssc01200:Carbon metabolism,ssc04146:Peroxisome,
ENSSSCG00000003601	hypocretin receptor 1(HCRTR1)	Sus scrofa	ssc04080:Neuroactive ligand-receptor interaction,
ENSSSCG00000021504	interferon-alphaomega(IFN-ALPHAOMEGA)	Sus scrofa	ssc04060:Cytokine-cytokine receptor interaction,ssc04151:PI3K-Akt signaling pathway,ssc04620:Toll-like receptor signaling pathway,ssc04622:RIG-I-like receptor signaling pathway,ssc04623:Cytosolic DNA-sensing pathway,ssc04630:Jak-STAT signaling pathway,ssc04650:Natural killer cell mediated cytotoxicity,ssc05152:Tuberculosis,ssc05160:Hepatitis C,ssc05161:Hepatitis B,ssc05162:Measles,ssc05164:Influe…
ENSSSCG00000015653	interleukin 19(IL19)	Sus scrofa	ssc04630:Jak-STAT signaling pathway,
ENSSSCG00000025818	interleukin 9(IL9)	Sus scrofa	ssc04060:Cytokine-cytokine receptor interaction,ssc04630:Jak-STAT signaling pathway,ssc05310:Asthma,
ENSSSCG00000015799	kallikrein B1(KLKB1)	Sus scrofa	ssc04610:Complement and coagulation cascades,
ENSSSCG00000018886	microRNA 103-1(MIR103-1)	Sus scrofa	ssc05206:MicroRNAs in cancer,
ENSSSCG00000022382	microRNA 103-2(MIR103-2)	Sus scrofa	ssc05206:MicroRNAs in cancer,
ENSSSCG00000019270	microRNA 10a(MIR10A)	Sus scrofa	ssc05205:Proteoglycans in cancer,ssc05206:MicroRNAs in cancer,
ENSSSCG00000019808	microRNA 16-2(MIR16-2)	Sus scrofa	ssc05206:MicroRNAs in cancer,
ENSSSCG00000019722	microRNA 181a-1(MIR181A-1)	Sus scrofa	ssc05206:MicroRNAs in cancer,
ENSSSCG00000019535	microRNA 18a(MIR18A)	Sus scrofa	ssc05206:MicroRNAs in cancer,
ENSSSCG00000019191	microRNA 423(MIR423)	Sus scrofa	ssc05206:MicroRNAs in cancer,
ENSSSCG00000028046	microRNA 7-2(MIR7-2)	Sus scrofa	ssc05206:MicroRNAs in cancer,
ENSSSCG00000018681	microRNA 92a-1(MIR92A-1)	Sus scrofa	ssc05206:MicroRNAs in cancer,
ENSSSCG00000018164	microRNA let-7c(MIRLET7C)	Sus scrofa	ssc05206:MicroRNAs in cancer,
ENSSSCG00000017076	neuromedin U receptor 2(NMUR2)	Sus scrofa	ssc04080:Neuroactive ligand-receptor interaction,
ENSSSCG00000028913	nuclear RNA export factor 2(LOC100153087)	Sus scrofa	ssc03008:Ribosome biogenesis in eukaryotes,ssc03013:RNA transport,ssc03015:mRNA surveillance pathway,ssc05164:Influenza A,ssc05168:Herpes simplex infection,
ENSSSCG00000012665	olfactory receptor 1020-like(LOC100511059)	Sus scrofa	ssc04740:Olfactory transduction,
ENSSSCG00000006411	olfactory receptor 10J1-like(LOC100155688)	Sus scrofa	ssc04740:Olfactory transduction,
ENSSSCG00000013123	olfactory receptor 10V1-like(LOC100514625)	Sus scrofa	ssc04740:Olfactory transduction,
ENSSSCG00000026768	olfactory receptor 13C4(LOC100152911)	Sus scrofa	ssc04740:Olfactory transduction,
ENSSSCG00000005419	olfactory receptor 13D1(LOC100739563)	Sus scrofa	ssc04740:Olfactory transduction,
ENSSSCG00000030554	olfactory receptor 13F1-like(LOC100153672)	Sus scrofa	ssc04740:Olfactory transduction,
ENSSSCG00000014617	olfactory receptor 226(LOC100738942)	Sus scrofa	ssc04740:Olfactory transduction,
ENSSSCG00000007959	olfactory receptor 2C1(LOC100516428)	Sus scrofa	ssc04740:Olfactory transduction,
ENSSSCG00000023516	olfactory receptor 2W3-like(LOC100516810)	Sus scrofa	ssc04740:Olfactory transduction,
ENSSSCG00000013851	olfactory receptor 2Z1-like(LOC100511184)	Sus scrofa	ssc04740:Olfactory transduction,
ENSSSCG00000021523	olfactory receptor 4F4-like(LOC100157950)	Sus scrofa	ssc04740:Olfactory transduction,
ENSSSCG00000014767	olfactory receptor 51D1(LOC100737577)	Sus scrofa	ssc04740:Olfactory transduction,
ENSSSCG00000014764	olfactory receptor 51E2(LOC100515043)	Sus scrofa	ssc04740:Olfactory transduction,
ENSSSCG00000014760	olfactory receptor 51F1-like(LOC100511705)	Sus scrofa	ssc04740:Olfactory transduction,
ENSSSCG00000014704	olfactory receptor 51G2-like(LOC100516685)	Sus scrofa	ssc04740:Olfactory transduction,
ENSSSCG00000014756	olfactory receptor 51H1-like(LOC100511338)	Sus scrofa	ssc04740:Olfactory transduction,
ENSSSCG00000014755	olfactory receptor 51H1-like(LOC100513557)	Sus scrofa	ssc04740:Olfactory transduction,
ENSSSCG00000029107	olfactory receptor 52D1-like(LOC100736885)	Sus scrofa	ssc04740:Olfactory transduction,
ENSSSCG00000006425	olfactory receptor 6K6(LOC100155266)	Sus scrofa	ssc04740:Olfactory transduction,
ENSSSCG00000030537	olfactory receptor 6V1-like(LOC100621272)	Sus scrofa	ssc04740:Olfactory transduction,
ENSSSCG00000005801	olfactory receptor 8I2-like(LOC100155816)	Sus scrofa	ssc04740:Olfactory transduction,
ENSSSCG00000004074	opioid receptor mu 1(OPRM1)	Sus scrofa	ssc04080:Neuroactive ligand-receptor interaction,ssc04915:Estrogen signaling pathway,ssc05032:Morphine addiction,
ENSSSCG00000007164	oxytocin/neurophysin I prepropeptide(OXT)	Sus scrofa	ssc04921:Oxytocin signaling pathway,
ENSSSCG00000012045	potassium voltage-gated channel subfamily E regulatory subunit 2(KCNE2)	Sus scrofa	ssc04971:Gastric acid secretion,
ENSSSCG00000015236	potassium voltage-gated channel subfamily J member 1(KCNJ1)	Sus scrofa	ssc04960:Aldosterone-regulated sodium reabsorption,ssc04971:Gastric acid secretion,
ENSSSCG00000022759	putative dimethylaniline monooxygenase [N-oxide-forming] 6(LOC100523745)	Sus scrofa	ssc00982:Drug metabolism - cytochrome P450,
ENSSSCG00000028929	putative olfactory receptor 2W6(LOC100516618)	Sus scrofa	ssc04740:Olfactory transduction,
ENSSSCG00000009336	relaxin receptor 2-like(LOC100155774)	Sus scrofa	ssc04080:Neuroactive ligand-receptor interaction,
ENSSSCG00000010374	retinol binding protein 3(RBP3)	Sus scrofa	ssc03420:Nucleotide excision repair,
ENSSSCG00000011590	rhodopsin(RHO)	Sus scrofa	ssc04744:Phototransduction,
ENSSSCG00000007836	sodium channel epithelial 1 gamma subunit(SCNN1G)	Sus scrofa	ssc04742:Taste transduction,ssc04960:Aldosterone-regulated sodium reabsorption,
ENSSSCG00000009078	solute carrier family 25 member 31(SLC25A31)	Sus scrofa	ssc04020:Calcium signaling pathway,ssc04022:cGMP-PKG signaling pathway,ssc05012:Parkinson's disease,ssc05016:Huntington's disease,ssc05166:HTLV-I infection,
ENSSSCG00000007348	solute carrier family 32 member 1(SLC32A1)	Sus scrofa	ssc04721:Synaptic vesicle cycle,ssc04723:Retrograde endocannabinoid signaling,ssc04727:GABAergic synapse,ssc05032:Morphine addiction,ssc05033:Nicotine addiction,
ENSSSCG00000021998	solute carrier organic anion transporter family member 1B3(LOC100620829)	Sus scrofa	ssc04976:Bile secretion,
ENSSSCG00000000585	solute carrier organic anion transporter family member 1C1(SLCO1C1)	Sus scrofa	ssc04919:Thyroid hormone signaling pathway,
ENSSSCG00000000631	taste 2 receptor member 9(TAS2R9)	Sus scrofa	ssc04742:Taste transduction,
ENSSSCG00000006749	thyroid stimulating hormone beta(TSHB)	Sus scrofa	ssc04080:Neuroactive ligand-receptor interaction,ssc04918:Thyroid hormone synthesis,ssc04923:Regulation of lipolysis in adipocytes,ssc05320:Autoimmune thyroid disease,
ENSSSCG00000029443	transketolase like 1(TKTL1)	Sus scrofa	ssc00030:Pentose phosphate pathway,ssc01100:Metabolic pathways,ssc01130:Biosynthesis of antibiotics,ssc01200:Carbon metabolism,ssc01230:Biosynthesis of amino acids,
