# Supplementary material for: Transcriptomic Study of Porcine Small Intestine Epithelial Cells Reveals Important Genes and Pathways Associated With Susceptibility to Escherichia coli F4ac Diarrhea
Source: Front Genet. 2020 Feb 27;11:68. doi: 10.3389/fgene.2020.00068 (PMC7056726; doi:10.3389/fgene.2020.00068)
Supplement: Supplementary file 10 [file Table_7.xlsx]

## Sheet: Sheet1
Supplementary Table S7: Biological processes GO term of 100 up-regulated differentially expressed genes in the comparison of non-adhesive vs adhesive small intestine epithelial cells
Term	Count	PValue	Genes
GO:1901566~organonitrogen compound biosynthetic process	7	0.0140009	ENSSSCG00000028420, ENSSSCG00000008183, ENSSSCG00000009788, ENSSSCG00000016041, ENSSSCG00000012252, ENSSSCG00000005992, ENSSSCG00000012911
GO:2001233~regulation of apoptotic signaling pathway	4	0.0180378	ENSSSCG00000009888, ENSSSCG00000006161, ENSSSCG00000003867, ENSSSCG00000012252
GO:0043043~peptide biosynthetic process	5	0.0205089	ENSSSCG00000028420, ENSSSCG00000008183, ENSSSCG00000009788, ENSSSCG00000012252, ENSSSCG00000012911
GO:2001242~regulation of intrinsic apoptotic signaling pathway	3	0.0205608	ENSSSCG00000009888, ENSSSCG00000003867, ENSSSCG00000012252
GO:0043604~amide biosynthetic process	5	0.0287953	ENSSSCG00000028420, ENSSSCG00000008183, ENSSSCG00000009788, ENSSSCG00000012252, ENSSSCG00000012911
GO:1901564~organonitrogen compound metabolic process	8	0.0317234	ENSSSCG00000028420, ENSSSCG00000008183, ENSSSCG00000009788, ENSSSCG00000016041, ENSSSCG00000016714, ENSSSCG00000012252, ENSSSCG00000005992, ENSSSCG00000012911
GO:0006518~peptide metabolic process	5	0.035826	ENSSSCG00000028420, ENSSSCG00000008183, ENSSSCG00000009788, ENSSSCG00000012252, ENSSSCG00000012911
GO:2001234~negative regulation of apoptotic signaling pathway	3	0.0384075	ENSSSCG00000006161, ENSSSCG00000003867, ENSSSCG00000012252
GO:1902235~regulation of endoplasmic reticulum stress-induced intrinsic apoptotic signaling pathway	2	0.0400706	ENSSSCG00000009888, ENSSSCG00000003867
GO:0042981~regulation of apoptotic process	6	0.0422706	ENSSSCG00000016122, ENSSSCG00000009888, ENSSSCG00000006161, ENSSSCG00000003867, ENSSSCG00000016714, ENSSSCG00000012252
GO:0043067~regulation of programmed cell death	6	0.0434901	ENSSSCG00000016122, ENSSSCG00000009888, ENSSSCG00000006161, ENSSSCG00000003867, ENSSSCG00000016714, ENSSSCG00000012252
GO:0034622~cellular macromolecular complex assembly	5	0.0501661	ENSSSCG00000009788, ENSSSCG00000015952, ENSSSCG00000009553, ENSSSCG00000005038, ENSSSCG00000012252
GO:0010941~regulation of cell death	6	0.0526352	ENSSSCG00000016122, ENSSSCG00000009888, ENSSSCG00000006161, ENSSSCG00000003867, ENSSSCG00000016714, ENSSSCG00000012252
GO:0097190~apoptotic signaling pathway	4	0.0546165	ENSSSCG00000009888, ENSSSCG00000006161, ENSSSCG00000003867, ENSSSCG00000012252
GO:0006915~apoptotic process	6	0.0598258	ENSSSCG00000016122, ENSSSCG00000009888, ENSSSCG00000006161, ENSSSCG00000003867, ENSSSCG00000016714, ENSSSCG00000012252
GO:0043603~cellular amide metabolic process	5	0.0600536	ENSSSCG00000028420, ENSSSCG00000008183, ENSSSCG00000009788, ENSSSCG00000012252, ENSSSCG00000012911
GO:0097193~intrinsic apoptotic signaling pathway	3	0.0610276	ENSSSCG00000009888, ENSSSCG00000003867, ENSSSCG00000012252
GO:0030888~regulation of B cell proliferation	2	0.0691015	ENSSSCG00000016122, ENSSSCG00000006161
GO:0012501~programmed cell death	6	0.0819987	ENSSSCG00000016122, ENSSSCG00000009888, ENSSSCG00000006161, ENSSSCG00000003867, ENSSSCG00000016714, ENSSSCG00000012252
GO:0044249~cellular biosynthetic process	13	0.0825669	ENSSSCG00000028420, ENSSSCG00000023775, ENSSSCG00000008183, ENSSSCG00000020754, ENSSSCG00000005038, ENSSSCG00000012911, ENSSSCG00000005006, ENSSSCG00000005040, ENSSSCG00000016041, ENSSSCG00000009788, ENSSSCG00000015952, ENSSSCG00000012252, ENSSSCG00000005992
GO:0006412~translation	4	0.0833558	ENSSSCG00000028420, ENSSSCG00000008183, ENSSSCG00000009788, ENSSSCG00000012252
GO:1901576~organic substance biosynthetic process	13	0.0929102	ENSSSCG00000028420, ENSSSCG00000023775, ENSSSCG00000008183, ENSSSCG00000020754, ENSSSCG00000005038, ENSSSCG00000012911, ENSSSCG00000005006, ENSSSCG00000005040, ENSSSCG00000016041, ENSSSCG00000009788, ENSSSCG00000015952, ENSSSCG00000012252, ENSSSCG00000005992
GO:0008219~cell death	6	0.0983342	ENSSSCG00000016122, ENSSSCG00000009888, ENSSSCG00000006161, ENSSSCG00000003867, ENSSSCG00000016714, ENSSSCG00000012252
