# Supplementary material for: Transcriptomic Study of Porcine Small Intestine Epithelial Cells Reveals Important Genes and Pathways Associated With Susceptibility to Escherichia coli F4ac Diarrhea
Source: Front Genet. 2020 Feb 27;11:68. doi: 10.3389/fgene.2020.00068 (PMC7056726; doi:10.3389/fgene.2020.00068)
Supplement: Supplementary file 11 [file Table_8.xlsx]

## Sheet: Sheet1
supplementary table S8: Biological processes GO-term of 100 donw-regulated differentially expressed genes in the comparison of non-adhesive vs adhesive small intestine epithelial cells
Term	Count	PValue	Genes
GO:0098655~cation transmembrane transport	8	1.54557e-05	ENSSSCG00000006745, ENSSSCG00000001752, ENSSSCG00000012699, ENSSSCG00000003156, ENSSSCG00000011040, ENSSSCG00000001592, ENSSSCG00000017005, ENSSSCG00000010144
GO:0042391~regulation of membrane potential	7	1.57864e-05	ENSSSCG00000006745, ENSSSCG00000012699, ENSSSCG00000011040, ENSSSCG00000000716, ENSSSCG00000001592, ENSSSCG00000010144, ENSSSCG00000001920
GO:0035637~multicellular organismal signaling	5	3.10669e-05	ENSSSCG00000003156, ENSSSCG00000011040, ENSSSCG00000000716, ENSSSCG00000001920, ENSSSCG00000016972
GO:0008015~blood circulation	7	3.69337e-05	ENSSSCG00000006745, ENSSSCG00000003156, ENSSSCG00000008749, ENSSSCG00000011040, ENSSSCG00000004803, ENSSSCG00000001920, ENSSSCG00000016972
GO:0003013~circulatory system process	7	4.08242e-05	ENSSSCG00000006745, ENSSSCG00000003156, ENSSSCG00000008749, ENSSSCG00000011040, ENSSSCG00000004803, ENSSSCG00000001920, ENSSSCG00000016972
GO:0071805~potassium ion transmembrane transport	5	5.56196e-05	ENSSSCG00000006745, ENSSSCG00000012699, ENSSSCG00000001592, ENSSSCG00000017005, ENSSSCG00000010144
GO:0071804~cellular potassium ion transport	5	5.56196e-05	ENSSSCG00000006745, ENSSSCG00000012699, ENSSSCG00000001592, ENSSSCG00000017005, ENSSSCG00000010144
GO:0098662~inorganic cation transmembrane transport	7	8.71674e-05	ENSSSCG00000006745, ENSSSCG00000012699, ENSSSCG00000003156, ENSSSCG00000011040, ENSSSCG00000001592, ENSSSCG00000017005, ENSSSCG00000010144
GO:0034220~ion transmembrane transport	8	8.88354e-05	ENSSSCG00000006745, ENSSSCG00000001752, ENSSSCG00000012699, ENSSSCG00000003156, ENSSSCG00000011040, ENSSSCG00000001592, ENSSSCG00000017005, ENSSSCG00000010144
GO:0031032~actomyosin structure organization	5	9.64095e-05	ENSSSCG00000006745, ENSSSCG00000013614, ENSSSCG00000001959, ENSSSCG00000004803, ENSSSCG00000010144
GO:0065008~regulation of biological quality	16	0.000116275	ENSSSCG00000006745, ENSSSCG00000022679, ENSSSCG00000012699, ENSSSCG00000008749, ENSSSCG00000011040, ENSSSCG00000000716, ENSSSCG00000015273, ENSSSCG00000010348, ENSSSCG00000001592, ENSSSCG00000016972, ENSSSCG00000003156, ENSSSCG00000006264, ENSSSCG00000001959, ENSSSCG00000015045, ENSSSCG00000010144, ENSSSCG00000001920
GO:0006813~potassium ion transport	5	0.000126119	ENSSSCG00000006745, ENSSSCG00000012699, ENSSSCG00000001592, ENSSSCG00000017005, ENSSSCG00000010144
GO:0030239~myofibril assembly	4	0.000136925	ENSSSCG00000006745, ENSSSCG00000001959, ENSSSCG00000004803, ENSSSCG00000010144
GO:0098660~inorganic ion transmembrane transport	7	0.000150332	ENSSSCG00000006745, ENSSSCG00000012699, ENSSSCG00000003156, ENSSSCG00000011040, ENSSSCG00000001592, ENSSSCG00000017005, ENSSSCG00000010144
GO:0032412~regulation of ion transmembrane transporter activity	5	0.000155538	ENSSSCG00000006745, ENSSSCG00000012699, ENSSSCG00000003156, ENSSSCG00000011040, ENSSSCG00000010144
GO:0060047~heart contraction	5	0.000168591	ENSSSCG00000006745, ENSSSCG00000003156, ENSSSCG00000011040, ENSSSCG00000004803, ENSSSCG00000001920
GO:0022898~regulation of transmembrane transporter activity	5	0.00018242	ENSSSCG00000006745, ENSSSCG00000012699, ENSSSCG00000003156, ENSSSCG00000011040, ENSSSCG00000010144
GO:0003015~heart process	5	0.00018242	ENSSSCG00000006745, ENSSSCG00000003156, ENSSSCG00000011040, ENSSSCG00000004803, ENSSSCG00000001920
GO:0032409~regulation of transporter activity	5	0.000246031	ENSSSCG00000006745, ENSSSCG00000012699, ENSSSCG00000003156, ENSSSCG00000011040, ENSSSCG00000010144
GO:0006812~cation transport	8	0.00024688	ENSSSCG00000006745, ENSSSCG00000001752, ENSSSCG00000012699, ENSSSCG00000003156, ENSSSCG00000011040, ENSSSCG00000001592, ENSSSCG00000017005, ENSSSCG00000010144
GO:0003008~system process	12	0.000312179	ENSSSCG00000006745, ENSSSCG00000001752, ENSSSCG00000022679, ENSSSCG00000003156, ENSSSCG00000008749, ENSSSCG00000006264, ENSSSCG00000011040, ENSSSCG00000000716, ENSSSCG00000004803, ENSSSCG00000010144, ENSSSCG00000001920, ENSSSCG00000016972
GO:2001257~regulation of cation channel activity	4	0.000331274	ENSSSCG00000006745, ENSSSCG00000003156, ENSSSCG00000011040, ENSSSCG00000010144
GO:1904062~regulation of cation transmembrane transport	5	0.000346309	ENSSSCG00000006745, ENSSSCG00000012699, ENSSSCG00000003156, ENSSSCG00000011040, ENSSSCG00000010144
GO:0002027~regulation of heart rate	4	0.00037492	ENSSSCG00000006745, ENSSSCG00000003156, ENSSSCG00000011040, ENSSSCG00000001920
GO:0006811~ion transport	9	0.000446435	ENSSSCG00000006745, ENSSSCG00000001752, ENSSSCG00000012699, ENSSSCG00000003156, ENSSSCG00000011040, ENSSSCG00000001592, ENSSSCG00000023186, ENSSSCG00000017005, ENSSSCG00000010144
GO:0044057~regulation of system process	6	0.000466061	ENSSSCG00000006745, ENSSSCG00000003156, ENSSSCG00000006264, ENSSSCG00000011040, ENSSSCG00000001920, ENSSSCG00000016972
GO:0030001~metal ion transport	7	0.000542417	ENSSSCG00000006745, ENSSSCG00000012699, ENSSSCG00000003156, ENSSSCG00000011040, ENSSSCG00000001592, ENSSSCG00000017005, ENSSSCG00000010144
GO:0030029~actin filament-based process	7	0.000739601	ENSSSCG00000006745, ENSSSCG00000013614, ENSSSCG00000008749, ENSSSCG00000011040, ENSSSCG00000001959, ENSSSCG00000004803, ENSSSCG00000010144
GO:0055085~transmembrane transport	8	0.000779037	ENSSSCG00000006745, ENSSSCG00000001752, ENSSSCG00000012699, ENSSSCG00000003156, ENSSSCG00000011040, ENSSSCG00000001592, ENSSSCG00000017005, ENSSSCG00000010144
GO:0006936~muscle contraction	5	0.00107379	ENSSSCG00000006745, ENSSSCG00000003156, ENSSSCG00000011040, ENSSSCG00000010144, ENSSSCG00000001920
GO:0034765~regulation of ion transmembrane transport	5	0.00109926	ENSSSCG00000006745, ENSSSCG00000012699, ENSSSCG00000003156, ENSSSCG00000011040, ENSSSCG00000010144
GO:0098916~anterograde trans-synaptic signaling	6	0.00129592	ENSSSCG00000001752, ENSSSCG00000006264, ENSSSCG00000011040, ENSSSCG00000015045, ENSSSCG00000017005, ENSSSCG00000016972
GO:0099536~synaptic signaling	6	0.00129592	ENSSSCG00000001752, ENSSSCG00000006264, ENSSSCG00000011040, ENSSSCG00000015045, ENSSSCG00000017005, ENSSSCG00000016972
GO:0007268~chemical synaptic transmission	6	0.00129592	ENSSSCG00000001752, ENSSSCG00000006264, ENSSSCG00000011040, ENSSSCG00000015045, ENSSSCG00000017005, ENSSSCG00000016972
GO:0099537~trans-synaptic signaling	6	0.00129592	ENSSSCG00000001752, ENSSSCG00000006264, ENSSSCG00000011040, ENSSSCG00000015045, ENSSSCG00000017005, ENSSSCG00000016972
GO:0006941~striated muscle contraction	4	0.00135632	ENSSSCG00000006745, ENSSSCG00000003156, ENSSSCG00000011040, ENSSSCG00000001920
GO:0010959~regulation of metal ion transport	5	0.00140814	ENSSSCG00000006745, ENSSSCG00000012699, ENSSSCG00000003156, ENSSSCG00000011040, ENSSSCG00000010144
GO:0034762~regulation of transmembrane transport	5	0.00143893	ENSSSCG00000006745, ENSSSCG00000012699, ENSSSCG00000003156, ENSSSCG00000011040, ENSSSCG00000010144
GO:0045214~sarcomere organization	3	0.00150273	ENSSSCG00000006745, ENSSSCG00000001959, ENSSSCG00000010144
GO:0055002~striated muscle cell development	4	0.00157268	ENSSSCG00000006745, ENSSSCG00000001959, ENSSSCG00000004803, ENSSSCG00000010144
GO:1901016~regulation of potassium ion transmembrane transporter activity	3	0.00199014	ENSSSCG00000006745, ENSSSCG00000012699, ENSSSCG00000010144
GO:0055001~muscle cell development	4	0.00206767	ENSSSCG00000006745, ENSSSCG00000001959, ENSSSCG00000004803, ENSSSCG00000010144
GO:0008016~regulation of heart contraction	4	0.00213558	ENSSSCG00000006745, ENSSSCG00000003156, ENSSSCG00000011040, ENSSSCG00000001920
GO:0003012~muscle system process	5	0.00215828	ENSSSCG00000006745, ENSSSCG00000003156, ENSSSCG00000011040, ENSSSCG00000010144, ENSSSCG00000001920
GO:0015672~monovalent inorganic cation transport	5	0.0022417	ENSSSCG00000006745, ENSSSCG00000012699, ENSSSCG00000001592, ENSSSCG00000017005, ENSSSCG00000010144
GO:0030036~actin cytoskeleton organization	6	0.00252952	ENSSSCG00000006745, ENSSSCG00000013614, ENSSSCG00000008749, ENSSSCG00000001959, ENSSSCG00000004803, ENSSSCG00000010144
GO:0061337~cardiac conduction	3	0.00337863	ENSSSCG00000003156, ENSSSCG00000011040, ENSSSCG00000001920
GO:2000021~regulation of ion homeostasis	4	0.00360254	ENSSSCG00000006745, ENSSSCG00000012699, ENSSSCG00000003156, ENSSSCG00000001920
GO:1901379~regulation of potassium ion transmembrane transport	3	0.00383849	ENSSSCG00000006745, ENSSSCG00000012699, ENSSSCG00000010144
GO:0042592~homeostatic process	9	0.00396506	ENSSSCG00000006745, ENSSSCG00000012699, ENSSSCG00000003156, ENSSSCG00000001959, ENSSSCG00000000716, ENSSSCG00000015273, ENSSSCG00000010348, ENSSSCG00000001920, ENSSSCG00000016972
GO:0043269~regulation of ion transport	5	0.00428001	ENSSSCG00000006745, ENSSSCG00000012699, ENSSSCG00000003156, ENSSSCG00000011040, ENSSSCG00000010144
GO:1901019~regulation of calcium ion transmembrane transporter activity	3	0.00432582	ENSSSCG00000006745, ENSSSCG00000003156, ENSSSCG00000011040
GO:0050801~ion homeostasis	6	0.00476524	ENSSSCG00000006745, ENSSSCG00000012699, ENSSSCG00000003156, ENSSSCG00000000716, ENSSSCG00000015273, ENSSSCG00000001920
GO:0055117~regulation of cardiac muscle contraction	3	0.00484032	ENSSSCG00000006745, ENSSSCG00000003156, ENSSSCG00000001920
GO:1903522~regulation of blood circulation	4	0.00508491	ENSSSCG00000006745, ENSSSCG00000003156, ENSSSCG00000011040, ENSSSCG00000001920
GO:0048878~chemical homeostasis	7	0.00605229	ENSSSCG00000006745, ENSSSCG00000012699, ENSSSCG00000003156, ENSSSCG00000000716, ENSSSCG00000015273, ENSSSCG00000001920, ENSSSCG00000016972
GO:0032844~regulation of homeostatic process	5	0.00615153	ENSSSCG00000006745, ENSSSCG00000012699, ENSSSCG00000003156, ENSSSCG00000001920, ENSSSCG00000016972
GO:0043266~regulation of potassium ion transport	3	0.00624336	ENSSSCG00000006745, ENSSSCG00000012699, ENSSSCG00000010144
GO:0006942~regulation of striated muscle contraction	3	0.00716375	ENSSSCG00000006745, ENSSSCG00000003156, ENSSSCG00000001920
GO:0051146~striated muscle cell differentiation	4	0.008225	ENSSSCG00000006745, ENSSSCG00000001959, ENSSSCG00000004803, ENSSSCG00000010144
GO:0010243~response to organonitrogen compound	5	0.00861021	ENSSSCG00000006745, ENSSSCG00000001752, ENSSSCG00000008749, ENSSSCG00000010144, ENSSSCG00000001920
GO:0060048~cardiac muscle contraction	3	0.00989731	ENSSSCG00000006745, ENSSSCG00000003156, ENSSSCG00000011040
GO:0010649~regulation of cell communication by electrical coupling	2	0.0115626	ENSSSCG00000006745, ENSSSCG00000003156
GO:0001508~action potential	3	0.0118056	ENSSSCG00000011040, ENSSSCG00000000716, ENSSSCG00000001920
GO:0007267~cell-cell signaling	7	0.0125765	ENSSSCG00000001752, ENSSSCG00000006264, ENSSSCG00000011040, ENSSSCG00000015045, ENSSSCG00000017005, ENSSSCG00000001920, ENSSSCG00000016972
GO:0010927~cellular component assembly involved in morphogenesis	4	0.0126991	ENSSSCG00000006745, ENSSSCG00000001959, ENSSSCG00000004803, ENSSSCG00000010144
GO:1903169~regulation of calcium ion transmembrane transport	3	0.0138622	ENSSSCG00000006745, ENSSSCG00000003156, ENSSSCG00000011040
GO:0010881~regulation of cardiac muscle contraction by regulation of the release of sequestered calcium ion	2	0.0172952	ENSSSCG00000006745, ENSSSCG00000003156
GO:0030836~positive regulation of actin filament depolymerization	2	0.0172952	ENSSSCG00000001959, ENSSSCG00000010144
GO:0044765~single-organism transport	11	0.0175925	ENSSSCG00000006745, ENSSSCG00000001752, ENSSSCG00000012699, ENSSSCG00000003156, ENSSSCG00000006264, ENSSSCG00000011040, ENSSSCG00000001592, ENSSSCG00000023186, ENSSSCG00000017005, ENSSSCG00000010144, ENSSSCG00000016972
GO:0071417~cellular response to organonitrogen compound	4	0.0180866	ENSSSCG00000006745, ENSSSCG00000008749, ENSSSCG00000010144, ENSSSCG00000001920
GO:0007015~actin filament organization	4	0.0198642	ENSSSCG00000008749, ENSSSCG00000001959, ENSSSCG00000004803, ENSSSCG00000010144
GO:0032989~cellular component morphogenesis	7	0.0201743	ENSSSCG00000006745, ENSSSCG00000022679, ENSSSCG00000008749, ENSSSCG00000001959, ENSSSCG00000017144, ENSSSCG00000004803, ENSSSCG00000010144
GO:1901698~response to nitrogen compound	5	0.0218341	ENSSSCG00000006745, ENSSSCG00000001752, ENSSSCG00000008749, ENSSSCG00000010144, ENSSSCG00000001920
GO:0006937~regulation of muscle contraction	3	0.0229531	ENSSSCG00000006745, ENSSSCG00000003156, ENSSSCG00000001920
GO:0044707~single-multicellular organism process	16	0.0236003	ENSSSCG00000010703, ENSSSCG00000008749, ENSSSCG00000011040, ENSSSCG00000000716, ENSSSCG00000017144, ENSSSCG00000010348, ENSSSCG00000004803, ENSSSCG00000016972, ENSSSCG00000001752, ENSSSCG00000011747, ENSSSCG00000003156, ENSSSCG00000006264, ENSSSCG00000001959, ENSSSCG00000015045, ENSSSCG00000010144, ENSSSCG00000001920
GO:0042692~muscle cell differentiation	4	0.0237017	ENSSSCG00000006745, ENSSSCG00000001959, ENSSSCG00000004803, ENSSSCG00000010144
GO:1901881~positive regulation of protein depolymerization	2	0.0258336	ENSSSCG00000001959, ENSSSCG00000010144
GO:0086019~cell-cell signaling involved in cardiac conduction	2	0.0258336	ENSSSCG00000011040, ENSSSCG00000001920
GO:0070509~calcium ion import	3	0.0267801	ENSSSCG00000006745, ENSSSCG00000003156, ENSSSCG00000011040
GO:1902578~single-organism localization	11	0.0277649	ENSSSCG00000006745, ENSSSCG00000001752, ENSSSCG00000012699, ENSSSCG00000003156, ENSSSCG00000006264, ENSSSCG00000011040, ENSSSCG00000001592, ENSSSCG00000023186, ENSSSCG00000017005, ENSSSCG00000010144, ENSSSCG00000016972
GO:0010882~regulation of cardiac muscle contraction by calcium ion signaling	2	0.0286638	ENSSSCG00000006745, ENSSSCG00000003156
GO:0072507~divalent inorganic cation homeostasis	4	0.0288687	ENSSSCG00000006745, ENSSSCG00000003156, ENSSSCG00000000716, ENSSSCG00000015273
GO:1901699~cellular response to nitrogen compound	4	0.0304941	ENSSSCG00000006745, ENSSSCG00000008749, ENSSSCG00000010144, ENSSSCG00000001920
GO:0043270~positive regulation of ion transport	3	0.0308469	ENSSSCG00000012699, ENSSSCG00000011040, ENSSSCG00000010144
GO:1901017~negative regulation of potassium ion transmembrane transporter activity	2	0.0314859	ENSSSCG00000006745, ENSSSCG00000010144
GO:1903514~calcium ion transport from endoplasmic reticulum to cytosol	2	0.0314859	ENSSSCG00000006745, ENSSSCG00000003156
GO:0014808~release of sequestered calcium ion into cytosol by sarcoplasmic reticulum	2	0.0314859	ENSSSCG00000006745, ENSSSCG00000003156
GO:0032845~negative regulation of homeostatic process	3	0.0320514	ENSSSCG00000006745, ENSSSCG00000003156, ENSSSCG00000016972
GO:0032501~multicellular organismal process	18	0.0326084	ENSSSCG00000006745, ENSSSCG00000022679, ENSSSCG00000010703, ENSSSCG00000008749, ENSSSCG00000011040, ENSSSCG00000000716, ENSSSCG00000017144, ENSSSCG00000010348, ENSSSCG00000004803, ENSSSCG00000016972, ENSSSCG00000001752, ENSSSCG00000011747, ENSSSCG00000003156, ENSSSCG00000006264, ENSSSCG00000001959, ENSSSCG00000015045, ENSSSCG00000010144, ENSSSCG00000001920
GO:0070588~calcium ion transmembrane transport	3	0.0332744	ENSSSCG00000006745, ENSSSCG00000003156, ENSSSCG00000011040
GO:0090257~regulation of muscle system process	3	0.0345156	ENSSSCG00000006745, ENSSSCG00000003156, ENSSSCG00000001920
GO:0008064~regulation of actin polymerization or depolymerization	3	0.0357748	ENSSSCG00000008749, ENSSSCG00000001959, ENSSSCG00000010144
GO:0030832~regulation of actin filament length	3	0.0357748	ENSSSCG00000008749, ENSSSCG00000001959, ENSSSCG00000010144
GO:0051924~regulation of calcium ion transport	3	0.0364111	ENSSSCG00000006745, ENSSSCG00000003156, ENSSSCG00000011040
GO:0043243~positive regulation of protein complex disassembly	2	0.0371064	ENSSSCG00000001959, ENSSSCG00000010144
GO:0070296~sarcoplasmic reticulum calcium ion transport	2	0.0371064	ENSSSCG00000006745, ENSSSCG00000003156
GO:0060314~regulation of ryanodine-sensitive calcium-release channel activity	2	0.0371064	ENSSSCG00000006745, ENSSSCG00000003156
GO:0019725~cellular homeostasis	5	0.0386744	ENSSSCG00000006745, ENSSSCG00000003156, ENSSSCG00000001959, ENSSSCG00000015273, ENSSSCG00000016972
GO:1901380~negative regulation of potassium ion transmembrane transport	2	0.0399048	ENSSSCG00000006745, ENSSSCG00000010144
GO:0086065~cell communication involved in cardiac conduction	2	0.0399048	ENSSSCG00000011040, ENSSSCG00000001920
GO:0010880~regulation of release of sequestered calcium ion into cytosol by sarcoplasmic reticulum	2	0.0399048	ENSSSCG00000006745, ENSSSCG00000003156
GO:0007010~cytoskeleton organization	6	0.0422744	ENSSSCG00000006745, ENSSSCG00000013614, ENSSSCG00000008749, ENSSSCG00000001959, ENSSSCG00000004803, ENSSSCG00000010144
GO:0008154~actin polymerization or depolymerization	3	0.0423325	ENSSSCG00000008749, ENSSSCG00000001959, ENSSSCG00000010144
GO:0043268~positive regulation of potassium ion transport	2	0.0426953	ENSSSCG00000012699, ENSSSCG00000010144
GO:0009719~response to endogenous stimulus	6	0.042966	ENSSSCG00000006745, ENSSSCG00000001752, ENSSSCG00000010703, ENSSSCG00000008749, ENSSSCG00000010144, ENSSSCG00000001920
GO:0051049~regulation of transport	7	0.0452641	ENSSSCG00000006745, ENSSSCG00000012699, ENSSSCG00000003156, ENSSSCG00000006264, ENSSSCG00000011040, ENSSSCG00000010144, ENSSSCG00000016972
GO:0016043~cellular component organization	16	0.0452966	ENSSSCG00000006745, ENSSSCG00000022679, ENSSSCG00000010703, ENSSSCG00000012699, ENSSSCG00000008749, ENSSSCG00000003366, ENSSSCG00000011040, ENSSSCG00000000716, ENSSSCG00000017144, ENSSSCG00000006345, ENSSSCG00000004803, ENSSSCG00000013614, ENSSSCG00000013330, ENSSSCG00000001959, ENSSSCG00000015045, ENSSSCG00000010144
GO:0048869~cellular developmental process	12	0.0462593	ENSSSCG00000006745, ENSSSCG00000010703, ENSSSCG00000022679, ENSSSCG00000008749, ENSSSCG00000003366, ENSSSCG00000001959, ENSSSCG00000000716, ENSSSCG00000015045, ENSSSCG00000017144, ENSSSCG00000004803, ENSSSCG00000010144, ENSSSCG00000015271
GO:0043267~negative regulation of potassium ion transport	2	0.0510196	ENSSSCG00000006745, ENSSSCG00000010144
GO:0051260~protein homooligomerization	3	0.051474	ENSSSCG00000013330, ENSSSCG00000000716, ENSSSCG00000010144
GO:0071822~protein complex subunit organization	6	0.0547186	ENSSSCG00000006745, ENSSSCG00000013330, ENSSSCG00000008749, ENSSSCG00000001959, ENSSSCG00000000716, ENSSSCG00000010144
GO:0055065~metal ion homeostasis	4	0.0563695	ENSSSCG00000006745, ENSSSCG00000003156, ENSSSCG00000000716, ENSSSCG00000015273
GO:0086091~regulation of heart rate by cardiac conduction	2	0.0565301	ENSSSCG00000011040, ENSSSCG00000001920
GO:0003254~regulation of membrane depolarization	2	0.0592737	ENSSSCG00000012699, ENSSSCG00000001920
GO:0086001~cardiac muscle cell action potential	2	0.0592737	ENSSSCG00000011040, ENSSSCG00000001920
GO:0071840~cellular component organization or biogenesis	16	0.0619946	ENSSSCG00000006745, ENSSSCG00000022679, ENSSSCG00000010703, ENSSSCG00000012699, ENSSSCG00000008749, ENSSSCG00000003366, ENSSSCG00000011040, ENSSSCG00000000716, ENSSSCG00000017144, ENSSSCG00000006345, ENSSSCG00000004803, ENSSSCG00000013614, ENSSSCG00000013330, ENSSSCG00000001959, ENSSSCG00000015045, ENSSSCG00000010144
GO:0061061~muscle structure development	4	0.0667531	ENSSSCG00000006745, ENSSSCG00000001959, ENSSSCG00000004803, ENSSSCG00000010144
GO:0032413~negative regulation of ion transmembrane transporter activity	2	0.0728762	ENSSSCG00000006745, ENSSSCG00000010144
GO:0019233~sensory perception of pain	2	0.0782636	ENSSSCG00000006264, ENSSSCG00000000716
GO:0014070~response to organic cyclic compound	4	0.0784899	ENSSSCG00000006745, ENSSSCG00000001752, ENSSSCG00000008749, ENSSSCG00000001920
GO:0071495~cellular response to endogenous stimulus	5	0.0799563	ENSSSCG00000006745, ENSSSCG00000010703, ENSSSCG00000008749, ENSSSCG00000010144, ENSSSCG00000001920
GO:0055013~cardiac muscle cell development	2	0.0809459	ENSSSCG00000004803, ENSSSCG00000010144
GO:0055080~cation homeostasis	4	0.0811562	ENSSSCG00000006745, ENSSSCG00000003156, ENSSSCG00000000716, ENSSSCG00000015273
GO:0032879~regulation of localization	8	0.0820108	ENSSSCG00000006745, ENSSSCG00000012699, ENSSSCG00000003156, ENSSSCG00000008749, ENSSSCG00000006264, ENSSSCG00000011040, ENSSSCG00000010144, ENSSSCG00000016972
GO:0055006~cardiac cell development	2	0.0836206	ENSSSCG00000004803, ENSSSCG00000010144
GO:0032956~regulation of actin cytoskeleton organization	3	0.0851066	ENSSSCG00000008749, ENSSSCG00000001959, ENSSSCG00000010144
GO:0098771~inorganic ion homeostasis	4	0.0860557	ENSSSCG00000006745, ENSSSCG00000003156, ENSSSCG00000000716, ENSSSCG00000015273
GO:0030834~regulation of actin filament depolymerization	2	0.0862878	ENSSSCG00000001959, ENSSSCG00000010144
GO:0070252~actin-mediated cell contraction	2	0.0862878	ENSSSCG00000011040, ENSSSCG00000004803
GO:0006816~calcium ion transport	3	0.0868437	ENSSSCG00000006745, ENSSSCG00000003156, ENSSSCG00000011040
GO:0032410~negative regulation of transporter activity	2	0.0889474	ENSSSCG00000006745, ENSSSCG00000010144
GO:1904063~negative regulation of cation transmembrane transport	2	0.0889474	ENSSSCG00000006745, ENSSSCG00000010144
GO:0019226~transmission of nerve impulse	2	0.0942442	ENSSSCG00000000716, ENSSSCG00000016972
GO:0030042~actin filament depolymerization	2	0.0942442	ENSSSCG00000001959, ENSSSCG00000010144
GO:0034766~negative regulation of ion transmembrane transport	2	0.0942442	ENSSSCG00000006745, ENSSSCG00000010144
GO:0055082~cellular chemical homeostasis	4	0.0945005	ENSSSCG00000006745, ENSSSCG00000003156, ENSSSCG00000015273, ENSSSCG00000016972
