# Supplementary material for: Transcriptomic Study of Porcine Small Intestine Epithelial Cells Reveals Important Genes and Pathways Associated With Susceptibility to Escherichia coli F4ac Diarrhea
Source: Front Genet. 2020 Feb 27;11:68. doi: 10.3389/fgene.2020.00068 (PMC7056726; doi:10.3389/fgene.2020.00068)
Supplement: Supplementary file 12 [file Table_9.xlsx]

## Sheet: Sheet1
Supplementary table S9: Cellular components GO-term of 100 up-regulated differentially expressed genes in the comparison of non-adhesive vs adhesive small intestine epithelial cells in Large White piglets
Category	Term	Count	PValue	Genes
GOTERM_CC_ALL	GO:0044444~cytoplasmic part	18	0.0053721	ENSSSCG00000028420, ENSSSCG00000023775, ENSSSCG00000009888, ENSSSCG00000008183, ENSSSCG00000020754, ENSSSCG00000005038, ENSSSCG00000005006, ENSSSCG00000004383, ENSSSCG00000016122, ENSSSCG00000001955, ENSSSCG00000005040, ENSSSCG00000001431, ENSSSCG00000016041, ENSSSCG00000003867, ENSSSCG00000009553, ENSSSCG00000016714, ENSSSCG00000012252, ENSSSCG00000011764
GOTERM_CC_ALL	GO:0010494~cytoplasmic stress granule	2	0.0564423	ENSSSCG00000028420, ENSSSCG00000012252
GOTERM_CC_ALL	GO:0005737~cytoplasm	20	0.0604607	ENSSSCG00000028420, ENSSSCG00000023775, ENSSSCG00000003798, ENSSSCG00000009888, ENSSSCG00000008183, ENSSSCG00000020754, ENSSSCG00000028331, ENSSSCG00000005038, ENSSSCG00000005006, ENSSSCG00000004383, ENSSSCG00000016122, ENSSSCG00000001955, ENSSSCG00000005040, ENSSSCG00000001431, ENSSSCG00000016041, ENSSSCG00000003867, ENSSSCG00000009553, ENSSSCG00000016714, ENSSSCG00000012252, ENSSSCG00000011764
GOTERM_CC_ALL	GO:0005788~endoplasmic reticulum lumen	2	0.0655446	ENSSSCG00000009888, ENSSSCG00000003867
GOTERM_CC_ALL	GO:0044446~intracellular organelle part	15	0.0996781	ENSSSCG00000009888, ENSSSCG00000023775, ENSSSCG00000008183, ENSSSCG00000020754, ENSSSCG00000005038, ENSSSCG00000005006, ENSSSCG00000001955, ENSSSCG00000001431, ENSSSCG00000003867, ENSSSCG00000015952, ENSSSCG00000009553, ENSSSCG00000016714, ENSSSCG00000012252, ENSSSCG00000010743, ENSSSCG00000011764
